# Heparan sulfate proteoglycans are increased during skeletal muscle regeneration: requirement of syndecan-3 for successful fiber formation

Juan Carlos Casar, Claudio Cabello-Verrugio, Hugo Olguin, Rebeca Aldunate, Nivaldo C. Inestrosa and Enrique Brandan\*

Centro de Regulación Celular y Patología, Facultad de Ciencias Biológicas, MIFAB, P. Universidad Católica de Chile, Santiago, Chile

\*Author for correspondence (e-mail: ebrandan@genes.bio.puc.cl)

Accepted 8 August 2003  
Journal of Cell Science 117, 73-84 Published by The Company of Biologists 2004  
doi:10.1242/jcs.00828

## Summary

Skeletal muscle regeneration is a highly complex and regulated process that involves muscle precursor proliferation and differentiation and probably requires the participation of heparin binding growth factors such as FGFs, HGF and TGF $\beta$ . Heparan sulfate proteoglycans, key components of cell-surfaces and ECM, modulate growth factor activities and influence cell growth and differentiation. Their expression in forming muscle masses during development and in cell culture, suggest their participation in the regulation of myogenesis. In the present study, heparan sulfate proteoglycan expression in skeletal muscle regeneration induced by barium chloride injection was evaluated. Expression of muscle differentiation markers and neuromuscular junction (NMJ) components was characterized. Immunoblots with anti- $\Delta$ -heparan sulfate antibody showed that four major species – perlecan,

glypican, syndecan-3 and syndecan-4 – were transiently up-regulated. The first three were detected at the surface or basement membranes of newly formed myotubes by specific indirect immunofluorescence. Syndecan-3, a satellite cell marker, showed the earliest and most significant increase. Experiments involving myoblast grafting into regenerating muscle showed that C2C12 cell clones, with inhibited syndecan-3 expression resulting from antisense transfection, presented a normal proliferation rate but an impaired capacity to fuse and form skeletal muscle fibers. These data constitute the first *in vivo* evidence suggesting the requirement of a specific heparan sulfate proteoglycan for successful skeletal muscle regeneration.

Key words: Proteoglycans, Myogenesis, Heparan sulfate, Perlecan, Syndecan-3, Skeletal muscle regeneration

## Introduction

Post-natal skeletal muscle formation occurs in mammals during the body growth period and also throughout the rest of the life as a damage-induced regenerative response. Satellite cells, mononuclear cells located at the periphery of mature myofibers and beneath its basal lamina, constitute the main source of muscle precursor cells after birth. Satellite cells normally rest in a quiescent state, but signals released after skeletal muscle injury induce their activation, proliferation and differentiation into mature myofibers in a process that resembles, in some aspects, embryonic myogenesis (Buckingham, 1992). Skeletal muscle differentiation is regulated by the expression of specific combinations of muscle regulatory transcription factors by precursor cells. Among them, a family of basic helix-loop-helix transcription factors called muscle regulatory factors (MRFs) is crucial for muscle differentiation (Seale and Rudnicki, 2000).

A complete understanding of the molecular mechanisms that regulate satellite cell activation and muscle differentiation has remained elusive. *In vivo*, the onset and progression of skeletal muscle regeneration are controlled by a complex set of interactions between muscle precursor cells and their environment. The presence of extracellular matrix (ECM), as has been demonstrated by *in vitro* studies (Melo et al., 1996; Osses and Brandan, 2001), is essential for normal myogenesis,

both through direct interactions of ECM molecules with plasma membrane receptors and through the modulation of growth factor activities. Growth factors are crucial regulators of skeletal muscle differentiation. Among them, some heparin-binding growth factors such as members of the fibroblast growth factor (FGF) family, hepatocyte growth factor/scatter factor (HGF) and transforming growth factor  $\beta$  (TGF $\beta$ ) have been implicated in satellite cell activation, migration, proliferation and as regulators of skeletal muscle differentiation (Hawke and Garry, 2001).

Heparan sulfate proteoglycans, which are present in almost all ECMs and on most eukaryotic cell surfaces, influence biological processes by interacting with a large number of physiologically important macromolecules. Cell-surface heparan sulfate proteoglycans can sequester soluble ligands thereby increasing their local concentration, and they can also modulate ligand-receptor encounters (Bernfield et al., 1999). HGF and FGF signaling is markedly enhanced by heparan sulfate. In particular, FGF2 shows an absolute requirement for heparan sulfate in order to transduce an intracellular signal through its receptors (Rapraeger et al., 1991; Yayon et al., 1991). Heparan sulfate interactions with other growth factors such as TGF $\beta$  isoforms, do not affect their binding to their membrane receptors, but protect the growth factors from inactivation (Lyon et al., 1997).

The role of heparan sulfate proteoglycans in skeletal muscle physiology and during skeletal muscle differentiation has been previously evaluated. In mature skeletal muscle tissue, heparan sulfate proteoglycans also act as co-receptors for the asymmetric form of acetyl cholinesterase (AChE) at the NMJ (Brandan et al., 1985; Peng et al., 1999). Several studies have been performed with C2C12 cells, a satellite cell line derived from regenerating adult mouse skeletal muscle that undergoes *in vitro* terminal myogenic differentiation after serum removal from the culture medium (Blau et al., 1985; Yaffe and Saxel, 1977). Inhibition of proteoglycan sulfation by chlorate treatment of C2C12 cultures (Melo et al., 1996; Osses and Brandan, 2001) or intact myofibers (Cornelison et al., 2001) affects the proper progression of the myogenic program *in vitro*. Moreover, *in vivo* administration of synthetic polymers that imitate heparan sulfate glycosaminoglycans accelerates both the regeneration and re-innervation of skeletal muscle (Desgranges et al., 1999).

Heparan sulfate proteoglycans are diverse and can be transmembrane, as syndecans, bound by a glycosyl phosphatidylinositol (GPI) linkage to plasma membrane lipid, as glypicans, or secreted into the basement membrane, as perlecan and agrin (Perrimon and Bernfield, 2000). Glypicans and syndecans represent the two main cell-surface heparan sulfate proteoglycans, and, in mammals, four separate syndecan and six separate glypican genes have been identified. We have shown that during C2C12 myogenesis the expression of perlecan, syndecan-1 and syndecan-3 is down-regulated (Fuentelba et al., 1999; Larrain et al., 1997a; Larrain et al., 1997b), whereas the expression of glypican is up-regulated (Brandan et al., 1996). This differential expression may reflect differing functions or macromolecular specificity during the process. Syndecans have been reported to modulate FGF2 activity in *in vitro* myogenesis (Fuentelba et al., 1999; Larrain et al., 1998; Rapraeger et al., 1991) and to participate in the modulation of growth factor activities, cell-cell adhesion and cell-matrix adhesion in developmental and adult wound repair processes (reviewed by Bernfield et al., 1999; Carey, 1997; Rapraeger, 2001). It has been reported recently that syndecan-3 and syndecan-4 are expressed by developing myocytes during embryonic limb skeletal muscle formation (Cornelison et al., 2001; Olguin and Brandan, 2001), and that the expression continues in adult muscle tissue but is restricted to satellite cells (Cornelison et al., 2001). Glypican-1 colocalizes with laminin in adult rat skeletal muscle (Brandan et al., 1996; Campos et al., 1993). Perlecan is an intrinsic constituent of skeletal muscle basal membrane that participates in the binding of  $\alpha$ -dystroglycan (Peng et al., 1998) and ECM molecules such as laminin (Yamagata et al., 1993), and it is present at NMJs where it is necessary for AChE localization (Arikawa-Hirasawa et al., 2002). In this study, heparan sulfate proteoglycan expression was studied in a model of skeletal muscle regeneration induced by barium chloride injection, and the functional participation of syndecan-3 was evaluated by myoblast transfer experiments into regenerating muscle with antisense clones.

## Materials and Methods

### Animals and experimental muscle injury

C57BL/10 ScSn male mice 8- to 12-weeks old were studied. The

animals were kept at room temperature with a 24 hour night-day cycle and fed with pellets and water *ad libitum*. Injury of normal muscles was performed by barium-chloride injection (Caldwell et al., 1990) in mice under ketamine/xylazine anesthesia [80/12 mg/kg body weight (b.w.), intraperitoneally (i.p.)]. Briefly, 60  $\mu$ l of an aqueous 1.2% mass/volume (m/w) BaCl<sub>2</sub> solution were injected along the whole length of the left tibialis anterior muscle (TA). Contralateral non-injected muscles were used as controls. After different recovery times (range 2-15 days), TAs were dissected and removed under anesthesia, and the animals were sacrificed. Tissues were rapidly frozen and stored at -80°C until processing. All protocols were conducted in strict accordance and with the formal approval of the Animal Ethics Committee of the P. Universidad Católica de Chile.

### Western blot analysis of proteoglycans

Protein extracts were prepared with a protocol slightly modified from that previously described by Brandan and Inestrosa (Brandan and Inestrosa, 1987). Briefly, skeletal muscle was homogenized in 4 M guanidine-HCl, 0.05 M sodium acetate (pH 5.8) and 1 mM PMSF at 4°C and maintained under agitation for 18 hours. The supernatant was equilibrated by dialysis with 8 M urea, 0.2 M NaCl, 0.05 M sodium acetate and 0.5% Triton X-100 to remove guanidine. Samples were concentrated by DEAE-Sephacel anion-exchange chromatography, equilibrated and washed with the same urea buffer and eluted with 1.0 M NaCl. The extracts were finally equilibrated with heparitinase buffer (100 mM Tris-HCl, 50 mM NaCl, pH 7.5). Protein content was determined as described previously (Riquelme et al., 2001).

Appropriate samples, containing equivalent amounts of proteins, were digested with heparitinase or chondroitinase ABC (Seikagaku, Tokio, Japan) and then analyzed by SDS-PAGE using a 4-15% acrylamide gradient in the separation gel. Proteins were electrophoretically transferred to nitrocellulose membranes, detected with anti- $\Delta$ -heparan sulfate monoclonal antibody 3G10 (Seikagaku, Tokio, Japan) or anti-perlecan polyclonal antibody as described previously (Olguin and Brandan, 2001), and visualized by enhanced chemiluminescence (Pierce, IL, USA). In parallel, blots of chondroitinase ABC-treated samples were detected with anti-decorin polyclonal antibodies [LF-113; kindly donated by Dr L. Fisher, NIDR, NIH, Bethesda, MD (Fisher et al., 1995)]. Corresponding samples from the total homogenate in urea buffer were also analyzed by immunoblot as described above with monoclonal antibodies against myogenin (Olguin and Brandan, 2001) and embryonic myosin F1.652 [developed by Dr H. Blau (Silberstein et al., 1986) and obtained from the Developmental Studies Hybridoma Bank, developed under the auspices of the NICHD and maintained by The University of Iowa, Department of Biological Sciences, Iowa City, IA, USA].

### RNA isolation and northern blot analysis

Total RNA was isolated from skeletal muscles as described previously (Brandan et al., 1992; Chomczynski and Sacchi, 1987). Twenty micrograms RNA samples were electrophoresed in 1.2% agarose/formaldehyde gels and transferred to Nytran membranes (Schleicher & Schuell, Dassel, Germany) and hybridized with random primed [<sup>32</sup>P]dCTP-labeled cDNA probes for syndecan-3, glypican-1 and perlecan in hybridization buffer at 65°C as described previously (Brandan et al., 1996; Fuentelba et al., 1999; Larrain et al., 1997a). Hybridized membranes were washed twice at 65°C and exposed to Kodak X-ray film. To normalize signal intensity, blots were later stripped and rehybridized with GAPDH or 18S <sup>32</sup>P-labeled probes kindly donated by Dr J. Chianale (Department of Gastroenterology, Faculty of Medicine, P. Universidad Católica de Chile, Chile).

### Immunohistochemistry

Cryostat sections (6  $\mu$ m) of control and treated TAs at different

times after BaCl<sub>2</sub> injection were fixed for 20 minutes in 3% paraformaldehyde in phosphate-buffered saline (PBS), pH 7.4, blocked with 8% BSA in PBS and incubated at 4°C overnight with primary antibodies as described previously for syndecan-3 at a 1:50 dilution (Fuentelba et al., 1999), glypican (1:150) (Brandan et al., 1996) and perlecan (1:1500) (Larrain et al., 1997a). Anti- $\Delta$ -heparan sulfate antibody was used in a 1:500 dilution, and anti- $\alpha$ -dystroglycan (Upstate Biotechnology, NY, USA) and anti-embryonic myosin were used at 1:100 dilutions. Sections were then washed and incubated with either anti-rabbit-FITC, anti-mouse-TRITC or anti-mouse alkaline phosphatase-conjugated secondary antibodies (all diluted 1:100; Pierce, IL, USA) for 1 hour at room temperature. For nuclear staining, sections were incubated with 1  $\mu$ g/ml Hoechst 33258 in PBS for 10 minutes. After rinsing, the sections were mounted with fluorescent mounting medium (Dako Corporation, CA, USA) under glass coverslips and viewed and photographed with a Nikon Eclipse microscope equipped for epifluorescence. Alkaline phosphatase activity was detected with NBT/BCIP (Sigma Chemical Co, MO, USA) and developed for 2-5 minutes at room temperature according to the manufacturer instructions.

For staining with anti- $\Delta$ -heparan sulfate antibody, the sections were pre-treated with 2.5 mU heparinase for 2 hours at 37°C (Friedl et al., 1997). For detection of nicotinic acetyl choline receptors (AChR), sections were first fixed for 5 minutes in 1% paraformaldehyde, rinsed and incubated in rhodamine-conjugated  $\alpha$ -bungarotoxin (Molecular Probes, OR, USA) for 1 hour (Bowe et al., 2000). Sections were then washed, fixed and processed as described above.

#### Constitutive $\beta$ -galactosidase expressing myoblasts

The mouse skeletal muscle cell line C2C12 (ATCC, VA, USA) was grown in Dulbecco's Modified Eagle's medium (DMEM) containing 10% fetal calf serum and 0.5% chick embryo extract (Larrain et al., 1998; Larrain et al., 1997b). For the antisense stable transfectants, 400  $\mu$ g/ml G418 was added to the growth medium. C2C12 myoblasts with an inhibited syndecan-3 expression [clones AN-10 and AN-8 (Fuentelba et al., 1999)] and wild-type C2C12 myoblasts were infected with a replication-defective retroviral vector containing the *lacZ* sequence (kindly provided by Dr María Rosa Bono, MIFAB and Immunology Laboratory, Universidad de Chile, Chile). This vector can only replicate in the NB5 mouse fibroblast cell line. Briefly, myoblasts were grown on six-well culture plates until reaching semi-confluence. Cells were incubated for 2 hours (37°C, 8% CO<sub>2</sub> and agitation) with 0.5 ml per well of NB5 conditioned medium from overnight culture, plus 2  $\mu$ l Polibrene (4 mg/ml; Sigma Chemical Co, MO, USA). After incubation, 2 ml of myoblast growth medium were added and the whole culture medium was replaced by fresh growth medium the day after.

In all cases,  $\beta$ -galactosidase-positive clones were isolated after clonal dilution by testing both the  $\beta$ -galactosidase activity and the persistence of the parental phenotype by morphological and specific molecular skeletal muscle markers, and will be herein referred to as C2C12i, AN-10i and AN-8i.

#### Myoblast transfer experiments

Once stable clones of C2C12i, AN-10i and AN-8i cells were obtained, cells were multiplied to obtain large populations for injection. The cells were removed with 0.05% trypsin-0.53 mM EDTA (Life Technologies, MA) and collected by centrifugation at 1,300 *g* for 10 minutes. 10<sup>6</sup> cells from each group were resuspended in 20  $\mu$ l of HBSS and separately injected with a 702 Hamilton syringe into mice TAs 24 hours after barium chloride injection. Myoblasts were injected slowly when the needle was being withdrawn from the muscle, after inserting it longitudinally, so they were delivered along the whole length of the TA. Three to seven muscles were injected with each of the clones for every different experimental time point, in each experimental series. Muscles were dissected out 1, 3, 5 and 7 days

later and frozen in isopentane chilled in liquid nitrogen. Cryostat sections (16  $\mu$ m) were obtained at the proximal and middle thirds of each muscle.

#### Histochemical detection of $\beta$ -galactosidase activity

*lacZ* reporter gene-derived  $\beta$ -gal activity was detected using the chromogenic substrate 5-bromo-4-chloro-3-indolyl  $\beta$ -D-galactopyranoside (X-gal). X-gal was used at a final concentration of 1 mg/ml in PBS containing 25 mM potassium ferrocyanide, 25 mM potassium ferricyanide, 2 mM MgCl<sub>2</sub>, 0.01% sodium deoxycholate and 0.02% Nonidet P-40. Sections were fixed in 3.7% formaldehyde in PBS, pH 7.4 containing 2 mM MgCl<sub>2</sub> and 1.25 mM EGTA for 10 minutes and incubated in X-gal solution overnight at 37°C. Sections were post-fixed and skeletal muscle fibers detected by immunohistochemistry against  $\alpha$ -dystroglycan or embryonic myosin as described above.

$\beta$ -galactosidase-positive cells and myotubes positive for both  $\beta$ -galactosidase and  $\alpha$ -dystroglycan or embryonic myosin were counted in 3-12 sections from the different zones of each muscle. Statistical difference among the fraction of  $\beta$ -galactosidase-positive fibers from the different clones was evaluated by unpaired Student's *t*-tests. To assess the diameter of  $\beta$ -galactosidase-positive fibers, measurements were made from at least five photomicrographs, taken with a 40 $\times$  objective lens, for each of the counted sections from day 7 after transplantation. The minimum diameter of all  $\beta$ -galactosidase-positive fibers was measured by an independent observer after importing the images into Adobe Photoshop 5.0 software.

#### Cell proliferation studies

Proliferation of the transplanted cells was evaluated by 5-bromo-2'-deoxyuridine (BrdU) labeling with the In Situ Cell Proliferation Kit, FLUOS (Roche Molecular Biochemicals, Mannheim, Germany). Briefly, animals were injected 20 hours after cell transplantation with 100  $\mu$ mol/kg b.w. BrdU i.p., and 4 hours later the mice were sacrificed and TA were harvested and processed as described above. After  $\beta$ -galactosidase detection, BrdU incorporation was determined according to the manufacturer instructions. The preparations were finally incubated with anti-BrdU FLUOS fluorescein-conjugated F(ab')<sub>2</sub> antibody fragments for 45 minutes at 37°C, rinsed and mounted. A pre-incubation with 20  $\mu$ g/ml sulphorhodamin 101 (Molecular Probes, OR, USA) was used to reduce non-specific fluorescence. Four muscles from each group were studied. Two to four sections from each muscle were completely scanned and images were acquired with bright-field and fluorescence microscopy. Cells positive for  $\beta$ -galactosidase and for BrdU and  $\beta$ -galactosidase were counted after merging the images with Adobe Photoshop 5.0 software. In vitro proliferation was estimated after plating the same number of cells (5,000 cells/cm<sup>2</sup>) of each clone and then removing them with 0.05% trypsin-0.53 mM EDTA at different time points. After collection of the cells by centrifugation at 1,300 *g*, they were resuspended in the same volume of growth medium and a sample was counted in a Neubauer chamber.

## Results

### Morphological and molecular characterization of the muscle necrotic-regeneration model

Injection of a 1.2% barium chloride solution induces necrosis of skeletal muscle fibers followed by the regeneration of the tissue (Caldwell et al., 1990). As can be observed in Fig. 1A, in the first 3 days after the injection abundant mononuclear cells, predominantly polymorphonuclear leukocytes and macrophages, are present in the enlarged intercellular space separating necrotic fibers. Spindle-shaped mononuclear cells

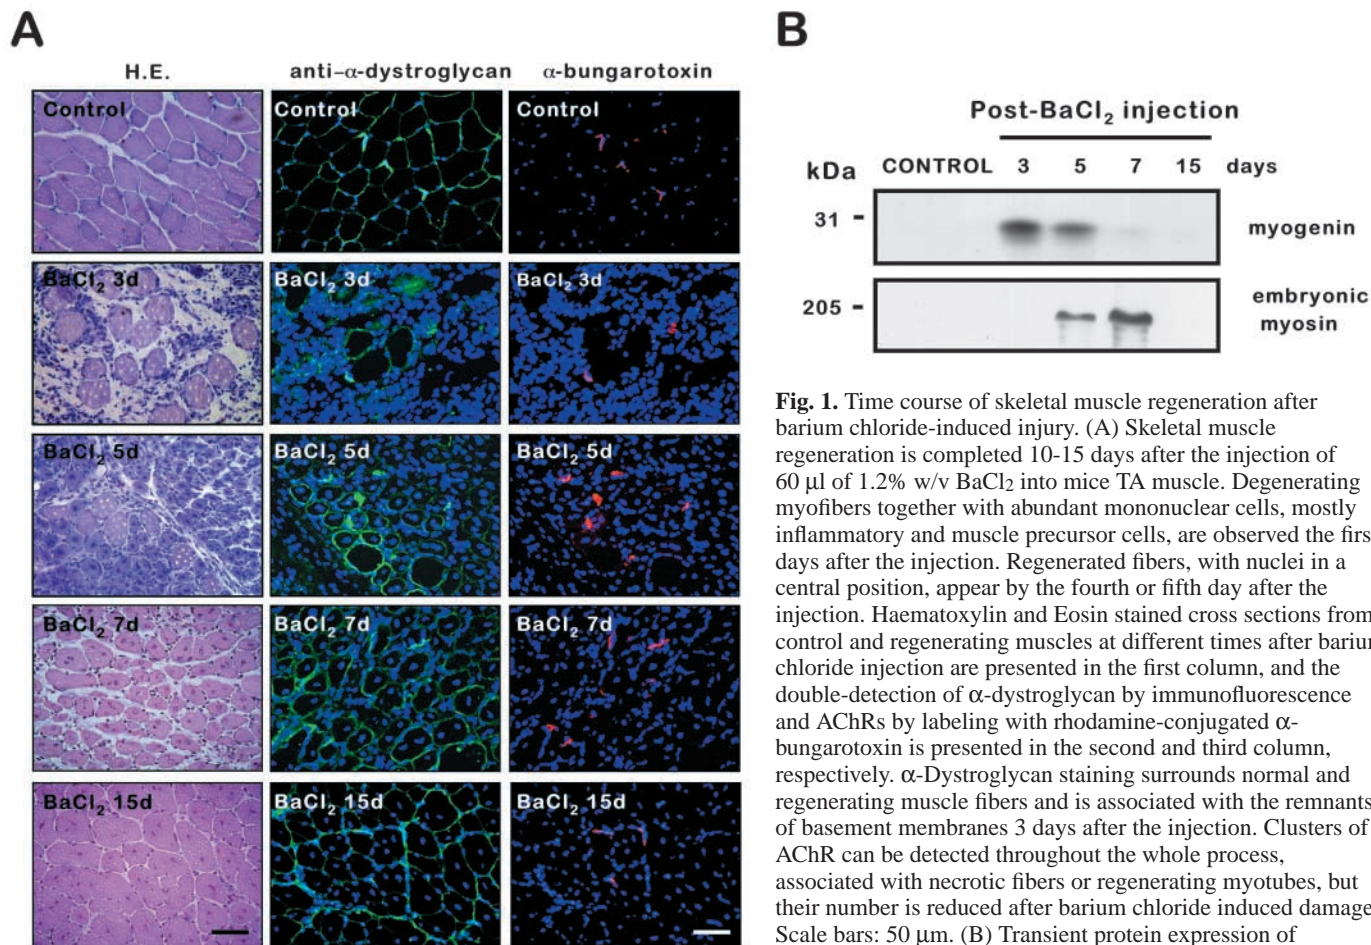

**Fig. 1.** Time course of skeletal muscle regeneration after barium chloride-induced injury. (A) Skeletal muscle regeneration is completed 10–15 days after the injection of 60  $\mu$ l of 1.2% w/v BaCl<sub>2</sub> into mice TA muscle. Degenerating myofibers together with abundant mononuclear cells, mostly inflammatory and muscle precursor cells, are observed the first days after the injection. Regenerated fibers, with nuclei in a central position, appear by the fourth or fifth day after the injection. Haematoxylin and Eosin stained cross sections from control and regenerating muscles at different times after barium chloride injection are presented in the first column, and the double-detection of  $\alpha$ -dystroglycan by immunofluorescence and AChRs by labeling with rhodamine-conjugated  $\alpha$ -bungarotoxin is presented in the second and third column, respectively.  $\alpha$ -Dystroglycan staining surrounds normal and regenerating muscle fibers and is associated with the remnants of basement membranes 3 days after the injection. Clusters of AChR can be detected throughout the whole process, associated with necrotic fibers or regenerating myotubes, but their number is reduced after barium chloride induced damage. Scale bars: 50  $\mu$ m. (B) Transient protein expression of myogenin and embryonic myosin during skeletal muscle

regeneration. Aliquots of extracts containing equivalent amounts of protein, obtained from control TA on different days after injury were subjected to SDS-PAGE, transferred to a nitrocellulose membrane and analyzed by western blot as described in the Materials and Methods.

that may represent activated satellite cells are apparent by the third day after the injection, and the first regenerated myotubes – slim and with the nucleus in a central position – appear by day 4 or 5. By the seventh day, most of the fibers have a central nucleus but their diameters are still highly heterogeneous. Myotubes continue maturing and by day 15 after the injection the tissue has recovered most of its normal morphology, with persistence of central nuclei and a slight increase in the interstitial spaces. The process of regeneration after barium chloride-induced damage, as evaluated by the proportion of fibers with centrally located nuclei, is homogeneous along the whole TA length and involves over 90% of the fibers (data not shown).

Basement membranes are initially preserved after myofiber degeneration and are supposed to serve a scaffolding function for muscle precursor cells and to conserve positional information of the original NMJ that facilitates re-innervation (Sanes et al., 1978). Its components are replaced at specific times in the new basement membranes synthesized by the regenerating fibers (Gulati et al., 1983).  $\alpha$ -Dystroglycan is an extracellular glycoprotein that is part of the dystrophin-associated protein complex in the sarcolemma of skeletal muscle fibers and has been reported to participate, together with heparan sulfate proteoglycans, in asymmetric AChE

clustering at the synaptic basal lamina.  $\alpha$ -Dystroglycan and AChR localization were followed during skeletal muscle regeneration by double-labeling with immunofluorescence and binding of  $\alpha$ -bungarotoxin conjugated with rhodamine, respectively (Fig. 1A).  $\alpha$ -Dystroglycan is present at the surface of the myofibers and concentrates at NMJ as is observed in control TA and in regenerated muscle 15 days after barium chloride injection. As has been previously described (Kaariainen et al., 2000; Vater et al., 1995), after damage,  $\alpha$ -dystroglycan staining can be observed firstly associated with residual basal lamina (day 3) and then at the surface of regenerating myotubes (days 5 and 7).  $\alpha$ -Bungarotoxin labeling is localized in NMJ in control sections. Three days after barium chloride injection, AChR clusters are still detected (although in a very reduced numbers, data not shown), probably associated with remnants of degenerating fibers. By the fifth day,  $\alpha$ -bungarotoxin labels the perimeter of some of the regenerating myotubes, but in others patches are observed. After 15 days, AChR clusters, albeit still reduced in number, are morphologically similar to those observed in control muscle.

During barium chloride-induced regeneration the myogenic process may be followed in vivo by the expression of markers such as MRF myogenin or the transient expression of the

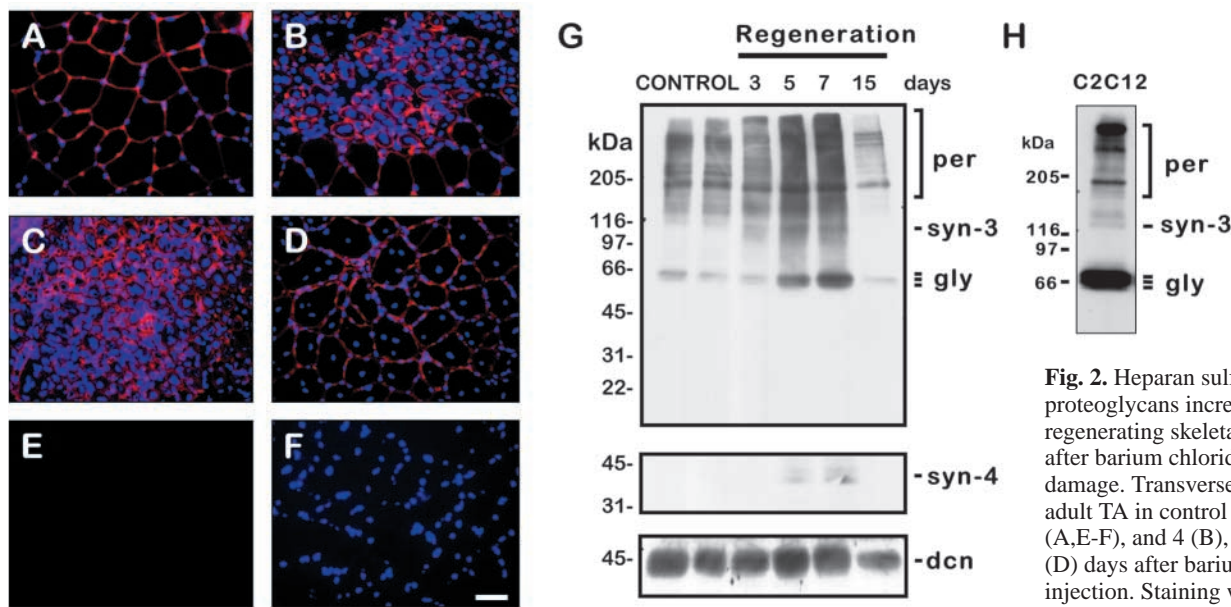

**Fig. 2.** Heparan sulfate proteoglycans increase in regenerating skeletal muscle fibers after barium chloride-induced damage. Transverse sections of adult TA in control conditions (A,E-F), and 4 (B), 5 (C) and 15 (D) days after barium chloride injection. Staining with anti- $\Delta$ -heparan sulfate antibody 3G10

(A-D, red) in cross sections pre-treated with the enzyme heparitinase, suggests that heparan sulfate proteoglycans are associated with regenerating skeletal muscle fibers. As a specificity control, anti- $\Delta$ -heparan sulfate antibody staining of a section not pre-treated with heparitinase is shown (E). Hoechst 33258 staining of the same section is shown in (F). Scale bar: 50  $\mu$ m. (G) On western blots with anti- $\Delta$ -heparan sulfate antibody, several bands appear to increase during skeletal muscle regeneration, and according to their electrophoretic migration pattern are probably perlecan (per), syndecan-3 (syn-3), glypican (gly) and syndecan-4 (syn-4, which appears with longer exposure times, lower inset), as is indicated at the right of the figure. Western blot detection of decorin (dcn), a proteoglycan that shows only minor variations during skeletal muscle regeneration (Casar et al., manuscript in preparation), in aliquots of the same proteoglycan-enriched samples, treated with chondroitinase ABC, is shown in the lowest inset as a loading control. (H) Electrophoretic migration pattern of the core proteins of heparan sulfate proteoglycan is similar to that observed in C2C12 myoblasts extracts with the anti- $\Delta$ -heparan sulfate antibody. Molecular mass standards are shown at the left (kDa).

embryonic isoform of skeletal muscle myosin. These markers are absent from normal adult muscle, but, after injury, transient up-regulation of myogenin was detected from days 3 to 5 after barium chloride injection, by western blot analysis, while embryonic myosin appeared as a later differentiation marker and was only detected between days 5 and 7 (Fig. 1B).

Thus, after barium chloride injection the process of skeletal muscle regeneration occurs during a precise time window and can be followed by its morphological features and the expression of molecular markers of differentiation.

#### Changes in heparan sulfate proteoglycans expression in skeletal muscle regeneration

Expression of heparan sulfate proteoglycans during skeletal muscle regeneration was first studied by immunofluorescence with the monoclonal antibody anti- $\Delta$ -heparan sulfate 3G10 (Fig. 2) that recognizes a neo-epitope generated in proteoglycan core proteins that are substituted with heparan sulfate after glycosaminoglycan digestion with the enzyme heparitinase from *Flovobacterium heparinum* (Steinfeld et al., 1996). In heparitinase-treated sections, anti- $\Delta$ -heparan sulfate immunodetection presented a similar staining pattern to that described above for  $\alpha$ -dystroglycan: in normal TA, staining of skeletal muscle fibers, surface and basement membrane was observed (Fig. 2A), and during regeneration an increased signal from heparan sulfate proteoglycan core proteins was detected associated with recent regenerating myotubes (day 4 and 5 after the injection are shown in Fig.

2B,C). Anti-heparan sulfate proteoglycans staining returned to its basal pattern after the regeneration process was completed (day 15, Fig. 2D). Heparan sulfate proteoglycans were also detected during the whole regeneration process as small ring-like structures around myofibers that were probably blood vessels. However, no staining associated with infiltrating cells was observed.

Detection of anti- $\Delta$ -heparan sulfate 3G10 epitope by western blot analysis allows the putative identification of various species in heparitinase-treated skeletal muscle samples, that may correspond to different heparan sulfate proteoglycan core proteins. As shown in Fig. 2G, a transient increase of several heparan sulfate proteoglycans was observed during skeletal muscle regeneration, especially on days 5 and 7 after barium chloride injection. Up-regulated core proteins migrated as (i) a triplet of 64-66 kDa, (ii) a band of 120 kDa and (iii) several high molecular mass bands, with three main bands of 300, 210 and 180 kDa. According to the electrophoretic migration pattern these proteoglycans were probably glypican, syndecan-3 and perlecan, respectively, as has been previously characterized in C2C12 myoblasts (Fig. 2H) based on their specific biochemical properties (Fuentelba et al., 1999; Larrain et al., 1997a; Larrain et al., 1997b). Interestingly, the 120 kDa band, corresponding to syndecan-3, was already increased by the third day after the injection. With longer exposure times, another 35 kDa band, which was probably corresponded to syndecan-4, appeared 5 and 7 days after barium chloride injection (Fig. 2G, lower inset). Up-regulation of these heparan sulfate proteoglycans shows a certain degree

**Fig. 3.** Expression of syndecan-3, glypican and perlecan by skeletal muscle fibers during TA regeneration. Heparan sulfate proteoglycans syndecan-3 (A-D), glypican-1 (E-H) and perlecan (I-L) were detected by immunofluorescence with the corresponding specific polyclonal antibodies in cross sections from control TA (A,E,I), and TA 4 (B,F,J), 5 (C,G,K) and 15 (D,H,L) days after barium chloride injection. Heparan sulfate proteoglycans are localized at the surface or basal lamina of myofibers, and increase in newly regenerated myotubes. Scale bar: 50  $\mu$ m.

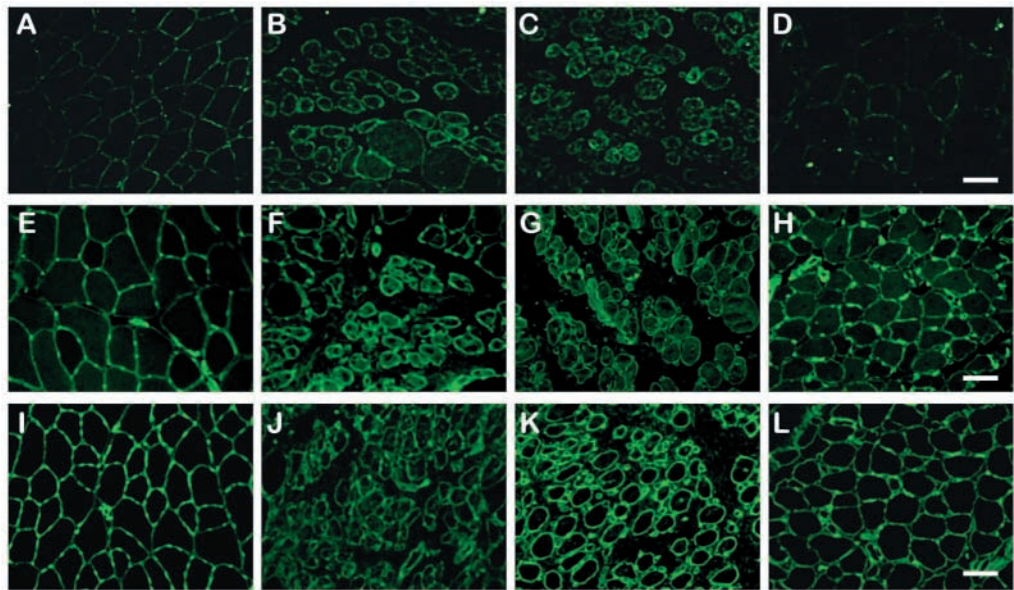

of specificity because other proteoglycans, e.g. the chondroitin/dermatan sulfate proteoglycan decorin, remain relatively unchanged (Fig. 2G, lowest inset) (Casar et al., manuscript in preparation).

#### Specific heparan sulfate proteoglycans expression in skeletal muscle regeneration: early up-regulation of syndecan-3

In order to advance the identification of the specific heparan sulfate proteoglycans that are up-regulated during skeletal muscle regeneration, the localization of the specific above mentioned proteoglycans in the tissue was studied by indirect immunofluorescence with polyclonal antibodies against the corresponding species (Fig. 3).

In control muscle, syndecan-3, glypican and perlecan were detected at the sarcolemma or endomysium in the periphery of myofibers and were absent from the perimysium (Fig. 3A,E and I, respectively). Syndecan-3 reactivity was weak and there was also some cytoplasmic staining for glypican (Fig. 3E). After injury, an increased staining for these three proteoglycans was apparent from day 4, preferentially surrounding the newly formed myotubes rather than with remnant myofibers in the same sections (Fig. 3B,F,J). This pattern of expression was maintained and more evident at day 5, where staining was absent from interstitial strips with abundant cellular infiltration (Fig. 3C,G,K). By the 15th day, the expression of syndecan-3, glypican and perlecan returned to basal levels (Fig. 3D,H,L).

Beneath the basal lamina of injured myofibers, until the fourth day after barium chloride injection, a number of elongated cells, positive for the expression of desmin (not shown) or embryonic myosin, could be observed (Fig. 4A). From their position, their elongated morphology and the expression of the markers described above these cells are probably nascent myotubes or myoblasts starting to differentiate (Gorza et al., 1983; Lawson-Smith and McGeachie, 1998; Sartore et al., 1982). Interestingly, syndecan-3, the heparan sulfate proteoglycan that showed an earlier increase (Fig. 2G), and could be detected at the surface

of these cells, whereas perlecan was mainly detected in the basal lamina of the myofiber.

An early increase of syndecan-3 transcripts was also observed during regeneration: a transient up-regulation of syndecan-3 steady state mRNA levels was observed between days 2 and 5 after barium chloride injection (Fig. 4B). The expression returned to basal, almost undetectable levels after the seventh day. Similar changes in mRNA expression were not observed for the other heparan sulfate proteoglycans studied. Glypican-1 mRNA showed a slight decrease in its expression the first days after the injection, followed by a transient increase on day 5 and then recovered its basal level of expression (Fig. 4B), and perlecan mRNA expression was not detectable with this assay, although its up-regulation was confirmed by western blot with specific antibodies (data not shown).

Taken together, these results confirm the up-regulation of different heparan sulfate proteoglycans in young myotubes and the early expression of syndecan-3 in myoblast cells and young myotubes.

#### Syndecan-3 expression in myoblast plasma membrane is important for successful fiber formation in myoblast transplant studies

Among the heparan sulfate proteoglycans that increase during skeletal muscle regeneration, syndecan-3 stands out as a possible regulator of the process for its low expression in normal muscle, its expression by quiescent and activated satellite cells (Cornelison et al., 2001), its early increase in regeneration (Figs 3 and 4) and for its localization in forming limb skeletal muscle masses during embryonic development (Olguin and Brandan, 2001). We have previously described two sub-clones of the skeletal muscle cell line C2C12 in which, by the stable transfection of an antisense-sequence encoding plasmid, syndecan-3 expression is inhibited (Fuentealba et al., 1999). In view of the lack of studies on the role of heparan sulfate proteoglycans in skeletal muscle regeneration *in vivo*, the specific role of syndecan-3 in this process was studied by

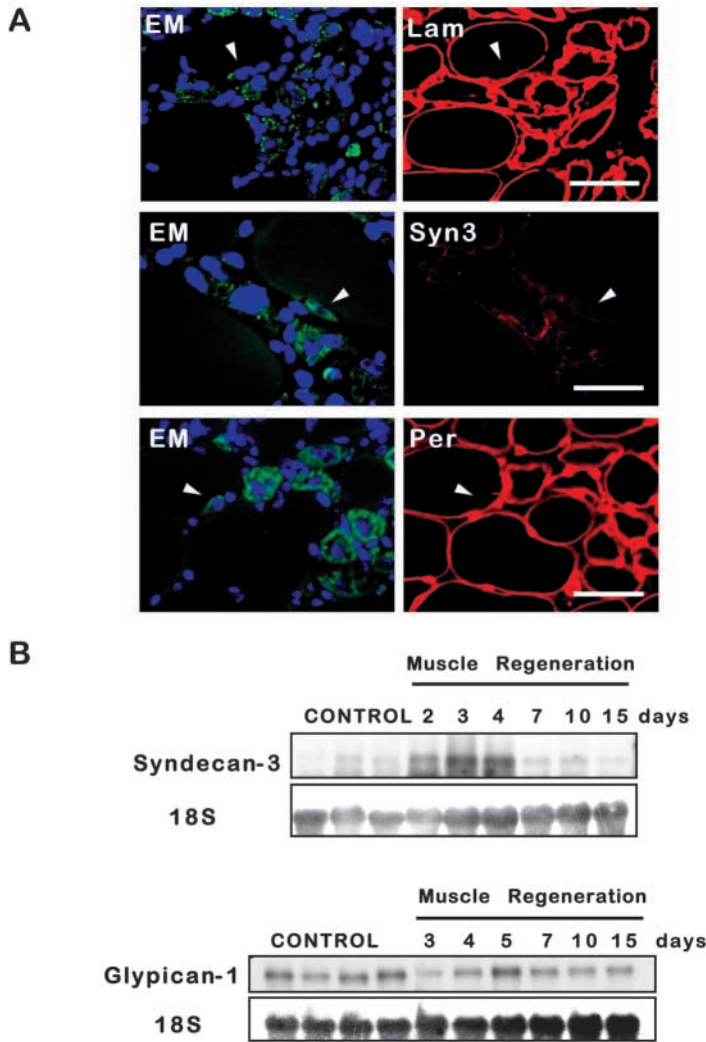

**Fig. 4.** Early up-regulation of syndecan-3 mRNA during skeletal muscle regeneration. (A) Double-labeling with anti-embryonic myosin F1.652 antibody (EM; detected with fluorescein-conjugated secondary antibodies, green) and specific antibodies (detected with rhodamine-conjugated secondary antibodies, red) against laminin (Lam), syndecan-3 (Syn3) and perlecan (Per) was performed in TA sections from muscles injected with barium chloride 4 days before. The arrowhead indicates elongated cells beneath the basal lamina of intact myofibers that express embryonic myosin, probably nascent myotubes, being formed by fusion of activated satellite cells. Syndecan-3 is detected on the surface of these cells expressing embryonic myosin. Perlecan, on the contrary, has a pattern similar to laminin staining. Nuclei were stained with Hoechst 33258 (blue) to facilitate morphological identification. The bar indicates 50  $\mu$ m. (B) A significant and early up-regulation of syndecan-3 mRNA during skeletal muscle regeneration was detected by northern blot, whereas only a small increase on the fifth day was observed for glypican-1 mRNA content.

myoblast transplantation into regenerating muscle (Hagiwara et al., 1995; Lee et al., 2000; Morgan et al., 1992).

Subclones of C2C12, AN-10 and AN-8 expressing the *lacZ* gene, which fully differentiate like their parental clones, were selected. No differences were observed in myoblast proliferation among the subclones in normal growing conditions (Fig. 5F), or in their fusion index 5 days after the myoblasts were induced to differentiate in vitro (data not shown). For in vivo studies, 24 hours after the injury induced by the barium chloride injection,  $10^6$  of AN-10i or C2C12i cells were injected intramuscularly along the whole length of the TAs of separate mice. After different time periods, the animals were killed and muscles were harvested for histological and immunohistochemical analysis. Proliferation of C2C12i and AN-10i myoblasts was assessed in vivo by BrdU labeling 24 hours after transplantation (Fig. 5A-D). No difference was observed in the fraction of  $\beta$ -galactosidase-positive cells that incorporated BrdU from either group at this time point ( $32.9 \pm 4.9\%$  C2C12i vs.  $29.0 \pm 3.05\%$  AN-10i myoblasts,  $P=0.23$ , unpaired Student's *t*-test), suggesting that inhibition of syndecan-3 expression does not impair the ability of myoblasts to proliferate in the damaged muscle tissue (Fig. 5E).

In vivo differentiation of the grafted cells was evaluated 3,

5 and 7 days after transplantation. At all these time points, multiple  $\beta$ -galactosidase-positive cells were detected in transverse sections from different zones of the muscles transplanted with either C2C12i or AN-10i myoblasts. Positive nuclei could be detected either centrally in regenerated myotubes or in mononuclear cells from the interstitial space (Fig. 6A). Differentiating cells or myotubes were detected by anti-embryonic myosin (preferred for day 3) or anti- $\alpha$ -dystroglycan immunostaining (on days 5 and 7). No qualitative differences were detected in the temporal expression of these markers, and quantification of embryonic myosin-positive or  $\alpha$ -dystroglycan-positive grafted cells or fibers on serial sections from day 5 yielded comparable results (Fig. 7). No differences were found in the number of  $\beta$ -galactosidase-positive cells expressing these markers in C2C12i and AN-10i myoblasts by day 3, when only about 2% of the cells expressed embryonic myosin in both groups (Fig. 6B). However, from the fifth day after transplantation a significantly smaller fraction of AN-10i than C2C12i cells could be detected in  $\alpha$ -dystroglycan-positive regenerating myotubes ( $18.6 \pm 0.9\%$  AN-10i vs.  $27.4 \pm 2.3\%$  C2C12i,  $P<0.01$ , Student's *t*-test; Fig. 6C). By day 7,  $77 \pm 4.2\%$  of C2C12i nuclei were forming new myofibers, while only  $42 \pm 5.3\%$  of AN-10i were detected within fibers ( $P<0.001$ , Student's *t*-test; Fig. 6D). There was no difference in the diameter of the  $\beta$ -galactosidase-positive fibers formed after the injection of either C2C12i or AN-10i myoblasts on day 7 ( $21.7 \pm 6.4 \mu$ m for C2C12i fibers vs.  $21.8 \pm 6.9 \mu$ m for AN-10i, mean diameter  $\pm$  s.d.), indicating that, broadly speaking, the in vivo differentiation process was similar in both groups and was probably commanded by the native muscle precursor cells.

These results, which suggest that myoblasts with inhibited syndecan-3 expression do not readily differentiate into myofibers in vivo, were confirmed in a second series of experiments comparing the differentiation of C2C12i with AN-10i and AN-8i myoblasts 5 days after transplantation (Fig. 7). A similar reduction in the ratio of  $\beta$ -galactosidase-positive cells expressing  $\alpha$ -dystroglycan or embryonic myosin was observed for both antisense clones as compared with C2C12i (in the case of  $\alpha$ -dystroglycan-positive myotubes, the ratio was decreased by  $40.6 \pm 8.8\%$  for AN-10i cells and  $57.3 \pm 22.6\%$  for AN-8i cells, mean  $\pm$  s.d.;  $P<0.01$  in each case, Student's *t*-test).

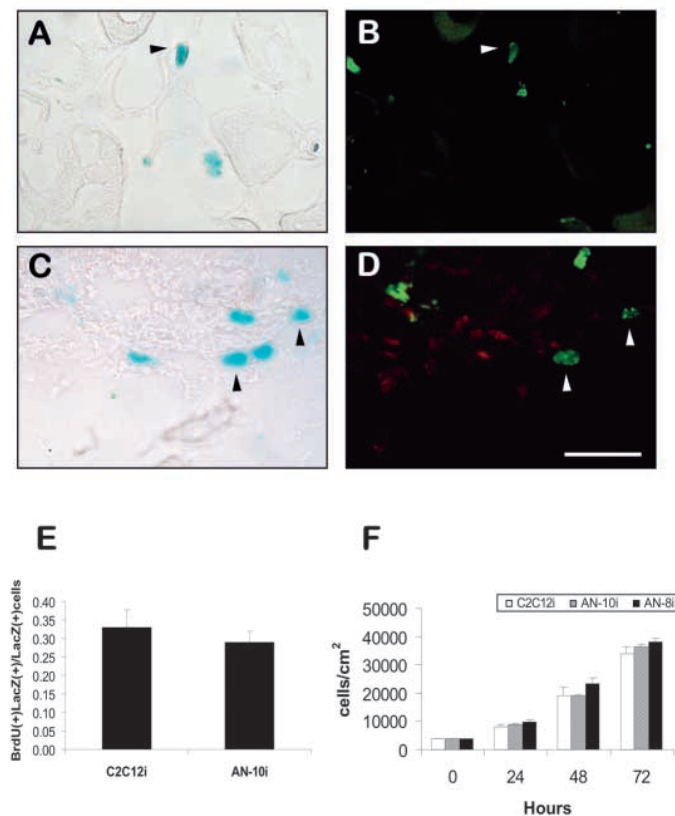

**Fig. 5.** Proliferation capacity in damaged muscle is not impaired in AN-10i as compared to C2C12i myoblasts 24 hours after transplantation. Representative microphotographs of skeletal muscle transverse sections 1 day after grafting with C2C12i (A,B) and AN-10i (C-D) myoblasts, showing X-gal staining of  $\beta$ -galactosidase (A,C) and immunofluorescent detection of BrdU labeling in the same sections (B,D). Arrowheads indicate nuclei positive for both BrdU and  $\beta$ -galactosidase. Scale bar: 50  $\mu$ m. (E) No difference was found between C2C12i and AN-10i myoblasts when BrdU labeling indexes were quantified in  $\beta$ -galactosidase-positive cells. (F) C2C12i and AN-10i proliferate at similar rates in normal growing conditions in cell culture.

Mean numbers of total  $\beta$ -galactosidase-positive cells per section were not significantly different among the groups (Fig. 7, legend). However, they were very variable but, because each syndecan-3 antisense clone reacted differently, the observed impairment in their expression of differentiation markers *in vivo* appears to be independent of the number of grafted cells present in regenerating muscle. In this respect, no difference was detected when the number of transplanted C2C12i cells was reduced by 75% (the fraction of  $\alpha$ -dystroglycan-positive grafted cells when  $2.5 \times 10^5$  cells were injected was  $95.7 \pm 7.4\%$  of the value obtained after transplanting  $10^6$  cells,  $n=4$ ). Taken together, the results imply that syndecan-3 expression by myoblasts may be required for successful skeletal muscle regeneration.

## Discussion

Skeletal muscle regeneration is a complex process that is not yet completely understood. Following skeletal muscle injury, several signals are released from degenerating myofibers,

infiltrating inflammatory cells and remodeling ECM that can affect reparative myogenesis. In the presence of multiple signals, the sequence of satellite cell activation, proliferation of muscle precursor cells and the transition through differentiation must be tightly regulated. Heparan sulfate proteoglycans, known modulators of growth factors activities are potentially involved in the regulation of these events. In this study, heparan sulfate proteoglycan expression was evaluated during mouse skeletal muscle regeneration induced by barium chloride injection. A transient up-regulation of the following heparan sulfate proteoglycans was observed: syndecan-3, glypican, perlecan and probably also syndecan-4. Increased expression of these proteoglycans was temporally coincident with expression of early markers of the differentiation process and was localized in newly formed myotubes. Up-regulation was earlier and more dramatic for syndecan-3, a cell surface heparan sulfate proteoglycan that has been previously implicated in myogenesis in cell culture studies and because of its pattern of expression during development (Cornelison et al., 2001; Fuentealba et al., 1999; Olguin and Brandan, 2001). We show that C2C12 cells with inhibited syndecan-3 expression were unable to fully differentiate when transplanted into regenerating skeletal muscle, constituting the first *in vivo* evidence of the participation of a specific proteoglycan in skeletal muscle regeneration.

Barium chloride induces necrosis and regeneration of skeletal muscle fibers, with a similar sequence of events to other widely used toxic models of injury (Hawke and Garry, 2001). Transient expression of early skeletal muscle markers of differentiation temporally circumscribe the myogenic process (Fig. 1). Active remodeling of basement membranes provides signals for a rapid and successful regeneration (Caldwell et al., 1990). In the case of an ischemic or toxic injury, new myofibers develop within the original basement membrane tubes, which permit the formation of NMJ at original synaptic sites (Sanes et al., 1978). Part of the information stored in these basement membrane specializations may depend on heparan sulfate proteoglycans such as agrin or perlecan (Gautam et al., 1996; Peng et al., 1999). In the present study, AChR clusters were observed in regenerating myotubes (Fig. 1A). Heparan sulfate proteoglycans were expressed with a different temporal pattern from the observed for NMJ components such as AChE or its collagenic tail colQ (data not showed).

Heparin binding growth factors such as FGFs, HGF and TGF $\beta$  are among the principal known regulators of skeletal muscle regeneration. They may be normally present in muscle tissue and released upon injury or secreted auto- or paracrinally by the cells during the regeneration process (Clarke et al., 1993; Jennische et al., 1993; Sakuma et al., 2000; Tatsumi et al., 1998). Quiescent and activated myoblasts express the c-met HGF receptor as well as FGF receptors [specially FGFR-1 and FGFR-4 (Cornelison and Wold, 1997; Kastner et al., 2000)]. However, adult satellite cells *in vitro* are initially responsive to HGF, but not to FGF2 and show a delayed entry into the cell cycle (Johnson and Allen, 1993; Johnson and Allen, 1995). Growth factor responsiveness, and consequently skeletal myogenesis, may be regulated by ligand and receptor availability (Scata et al., 1999), as well as by the presence of heparan sulfate proteoglycans at the cell surfaces or at basement membranes (that may be either presenting or



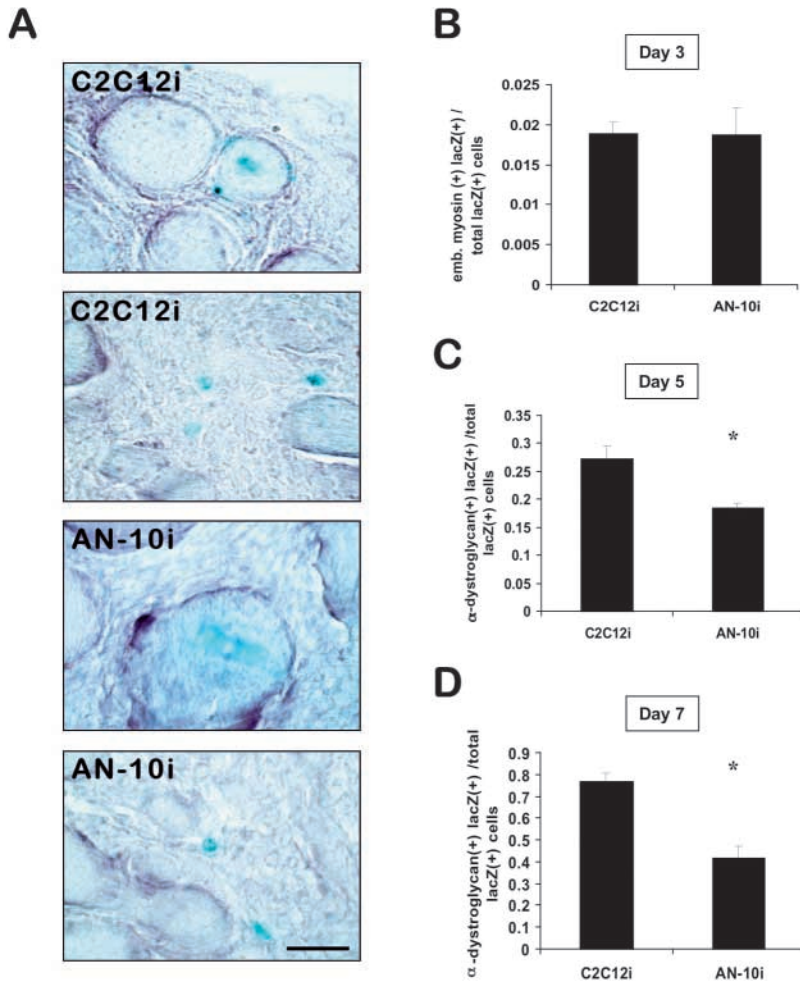

**Fig. 6.** AN-10i myoblast differentiation is impaired in regenerating skeletal muscle. (A) Representative photomicrographs of skeletal muscle transverse sections 7 days after grafting with C2C12i and AN-10i myoblasts.  $\beta$ -Galactosidase was detected with X-Gal staining and skeletal muscle fibers were detected by immunohistochemistry against  $\alpha$ -dystroglycan.  $\beta$ -Galactosidase-positive nuclei can be found incorporated into myofibers (C2C12i and AN-10i, upper panels) or in mononuclear cells in the interstitial tissue (C2C12i and AN-10i, lower panels). Scale bar: 25  $\mu$ m. (B-D) Quantification of the ratio of  $\beta$ -galactosidase-positive cells expressing differentiation markers (embryonic myosin or  $\alpha$ -dystroglycan) among total  $\beta$ -galactosidase-positive cells in transplantation experiments shows that only a minority of the grafted cells from both groups had differentiated 3 days after transplantation, and that on the fifth and seventh day fewer AN-10i myoblasts were incorporated into myofibers than wild-type C2C12i myoblasts (\*,  $P < 0.01$ , unpaired Student's *t*-test).

transcriptional regulation (Bernfield et al., 1999). In this study, up-regulation of both transcripts and core protein expression could only be detected for syndecan-3 (Fig. 4). For glypican-1 mRNA only a weak increase that followed a slight fall in its expression, could be observed on the same days that core protein up-regulation was detected in extracts and tissue sections. Concomitant up-regulation of other members of glypican family with similar relative molecular mass cannot be discounted.

Although in vitro evidence suggested heparan sulfate proteoglycans were involved in skeletal myogenesis (Cornelison et al., 2001; Fuentelba et al., 1999; Larrain et al., 1998), and in vivo studies suggested potential therapeutic benefits of artificial heparan sulfate mimetics for muscle regeneration (Desgranges et al., 1999), no previous in vivo data on the participation of naturally occurring heparan sulfate proteoglycans has been published. Mutant mice null for the expression of syndecan-1 or syndecan-4 do not present a pathological phenotype and the main abnormality detected so far has been defective skin repair (Bernfield et al., 1999; Echtermeyer et al., 2001; Stepp et al., 2002). Syndecan-3-deficient mice are born in the expected Mendelian ratios, have a normal lifespan and the only phenotype described to date are changes in hippocampal long-term potentiation and in spatial memory and an abnormal feeding behavior (Kaksonen et al., 2002; Reizes et al., 2001). Mice lacking perlecan show lethal defects related to the rupture of stress-sensitive basement membranes, but the only alteration that has been described in skeletal muscle is the absence of AChE at NMJs (Arikawa-Hirasawa et al., 2002; Costell et al., 1999). Interestingly, the role of other molecules in the regeneration of adult muscle was not evident in mutant mice initially. *MyoD*<sup>-/-</sup> and *Fgf6*<sup>-/-</sup> mutant mice do not show an unusual phenotype and can reach the adult stage, but their muscles regenerate with decreased efficiency compared to wild-type mice (Floss et al., 1997; Megeney et al., 1996).

In the present work, syndecan-3 participation in skeletal muscle regeneration was evaluated by myoblast transplantation studies of C2C12i myoblasts and two clones of myoblasts with

sequestering possible ligands). The up-regulation of different heparan sulfate proteoglycans during muscle regeneration was detected by immunoblot with 3G10 anti- $\Delta$ -heparan sulfate antibody (Fig. 2). Perlecan, glypican, syndecan-3 and probably syndecan-4 were the main increased heparan sulfate proteoglycan species, detected temporally and topologically with newly formed differentiating myotubes (Figs 2 and 3). A detailed localization analysis showed that in the first days, elongated cells at the periphery of damaged myofibers expressed syndecan-3 at the cell surface (Fig. 4). These cells, which express embryonic myosin, may be to nascent myotubes beginning to fuse beneath the basal lamina of morphologically intact myofibers. However, they may also belong to a sub-population of activated satellite cells ready to differentiate after a first division round (Rantanen et al., 1995). The expression of embryonic myosin in mononuclear satellite-like cells has been described previously during skeletal muscle regeneration (Gorza et al., 1983; Sartore et al., 1982).

Among other signals, growth factors such as FGF2 or TGF $\beta$ , and some inflammatory cytokines have been reported to regulate the expression of different heparan sulfate proteoglycans (Bernfield et al., 1999; Iozzo et al., 1997; Niu et al., 1998), and may participate in their up-regulation during skeletal muscle regeneration. Differences between protein expression and mRNA levels have been previously reported for heparan sulfate proteoglycans and attributed to post-

**Fig. 7.** Two subclones of C2C12 cells with inhibited syndecan-3 expression show a similar impairment in their differentiation capacity when transplanted into regenerating skeletal muscle. (A) Comparison of the quantification of the ratio of  $\beta$ -galactosidase positive cells that are also positive for  $\alpha$ -dystroglycan ( $\alpha$ -DG) on sections taken day 5 after transplantation shows that syndecan-3 antisense clones, AN-10i and AN-8i, have similarly defective expression of this differentiation marker in contrast to C2C12i ( $*P < 0.01$ , unpaired Student's *t*-test). Owing to its great variability, the total number of  $\beta$ -galactosidase-positive cells was not significantly different among the groups, but, interestingly, the two antisense clones showed opposite tendencies: a higher number of AN-8i cells and a lower number of AN-10i cells were observed compared to the mean number of C2C12i cells detected per section [for C2C12i,  $206 \pm 224$  cells/section ( $n=41$ ) were observed vs.  $294 \pm 180$  cells/section ( $n=38$ ) for AN-8i and  $109 \pm 143$  cells/section for AN-10i ( $n=39$ ); mean  $\pm$  s.d.]. (B) A similar result is obtained when quantification of  $\beta$ -galactosidase-positive myotubes is performed with embryonic myosin (EMHC), a second differentiation marker ( $*P < 0.01$ ;  $**P < 0.05$ , unpaired Student's *t*-test). (C) Representative transverse sections of  $\beta$ -galactosidase-positive cells in skeletal muscle 5 days after grafting, stained using anti-embryonic myosin histochemistry, for C2C12i, AN-10i and AN-8i myoblasts. Scale bar: 25  $\mu$ m.

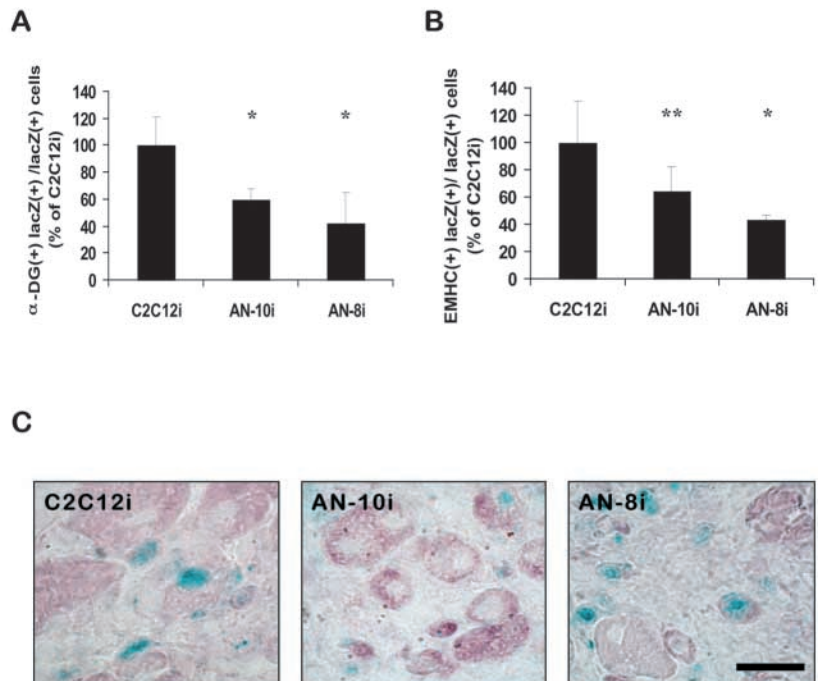

inhibited expression of syndecan-3 (AN-10i and AN-8i) in regenerating muscle. Analysis of syndecan-3 expression in C2C12 myoblasts showed that it is lost when the cells differentiate and that anti-sense blockade of syndecan-3 expression hastens their differentiation in vitro, a phenotype that can be reversed by heparin addition (Fuentelba et al., 1999). In vivo, AN-10i cells, when injected into regenerating muscle, show a normal proliferation rate during the first days after injury (Fig. 5). C2C12 and AN-10 myoblasts also proliferate at similar rates in vitro under normal growing conditions, but syndecan-3-defective myoblasts have a decreased proliferative response to FGF2 (L. Fuentelba and E.B., unpublished results). This suggests that, in vivo, the specific contribution of FGF2 to myoblast proliferation is probably redundant with the several other mitogens that are present in the tissue.

Both antisense clones, AN-10i and AN-8i, showed a decreased capacity to form or be incorporated into new myotubes in vivo (Figs 6 and 7), suggesting at least a partial syndecan-3 requirement for a successful regeneration. We have shown previously that myoblasts with an inhibited syndecan-3 expression differentiate earlier than wild-type C2C12 myoblasts in vitro after reducing the serum content of culture medium. We think this is not the case in the transplantation experiments, as the proportion of grafted cells expressing differentiation markers such as embryonic myosin or  $\alpha$ -dystroglycan increased progressively after transplantation of both C2C12i- and syndecan-3-deficient myoblasts, but it was lower in the antisense cells at all the time points studied. The differences observed in the total number of the transplanted cells detected in the tissue seem to be idiosyncratic for the different clones, and probably more dependent on their survival capacities and not related to their

differentiation potential. However, grafting experiments using fourfold fewer wild-type myoblasts, did not result in any change in the fraction of cells positive for both  $\beta$ -galactosidase and  $\alpha$ -dystroglycan over total  $\beta$ -galactosidase-positive cells, suggesting that, at least in the range studied, no minimal critical mass of myoblasts is required for differentiation.

Absence of syndecan-3 from muscle cells surfaces may alter the effects of growth factors on differentiation through directly affecting their binding to their signaling receptors, but may also affect cell-cell and cell-matrix interactions as members of the syndecan family may also act in the fine-tuning of integrin-induced changes of cytoskeletal organization (Rapraeger, 2001; Woods, 2001; Woods and Couchman, 2000). Surface proteins from the transmembrane 4 superfamily, convergent in some properties with the syndecans (Woods and Couchman, 2000), act as promoters of myoblast fusion and protect myotubes from apoptosis (Tachibana and Hemler, 1999). The partial magnitude of differentiation impairment observed for the cells with inhibited syndecan-3 expression may reflect the activity of native syndecan-3 from the host muscle or the redundancy of regulatory mechanisms acting over skeletal muscle regeneration. The more complex microenvironment that surrounds cells in vivo, comprising multiple signals affecting the differentiation process at different levels, may also explain possible differences between in vivo satellite cell behavior and in vitro studies (Schultz, 1996).

In this study, the expression of a heparan sulfate proteoglycan during skeletal muscle regeneration was studied. An increased expression of syndecan-3, glypican and perlecan by differentiating muscle cells was observed, and a requirement for syndecan-3 for successful regeneration in

myoblast transplant experiments was found. Future studies should explore the specific mechanism of syndecan-3 participation in skeletal muscle regeneration, and address the function of the other up-regulated proteoglycans in this process.

The authors are indebted to Dr John R. Hassell for generously providing anti-perlecan antibody and to Dr David J. Carey for generously providing anti-glypican and anti-syndecan-3 antibodies. This work was supported in part by grants from FONDAP-Biomedicine No. 13980001, FONDECYT 1990151 (to E.B.), and 2000113 (to J.C.C.). The research of E.B. was supported in part by an International Research Scholars grant from the Howard Hughes Medical Institute. E.B. and N.I. were supported by a Presidential Chair in Science from the Chilean Government. The Millennium Institute for Fundamental and Applied Biology (MIFAB) is financed in part by the Ministerio de Planificación y Cooperación (Chile).

## References

- Arikawa-Hirasawa, E., Rossi, S. G., Rotundo, R. L. and Yamada, Y. (2002). Absence of acetylcholinesterase at the neuromuscular junctions of perlecan-null mice. *Nat. Neurosci.* **5**, 119-123.
- Bernfield, M., Gotte, M., Park, P. W., Reizes, O., Fitzgerald, M. L., Lincecum, J. and Zako, M. (1999). Functions of cell surface heparan sulfate proteoglycans. *Annu. Rev. Biochem.* **68**, 729-777.
- Blau, H., Grace, K., Pavlath, E. C., Hardeman, C.-P. C., Silberstein, L., Webster, S. G., Miller, S. C. and Webster, C. (1985). Plasticity of the differentiated state. *Science* **230**, 758-766.
- Bowe, M. A., Mendis, D. B. and Fallon, J. R. (2000). The small leucine-rich repeat proteoglycan biglycan binds to alpha-dystroglycan and is upregulated in dystrophic muscle. *J. Cell Biol.* **148**, 801-810.
- Brandan, E., Carey, D. J., Larrain, J., Melo, F. and Campos, A. (1996). Synthesis and processing of glypican during differentiation of skeletal muscle cells. *Eur. J. Cell Biol.* **71**, 171-176.
- Brandan, E., Fuentes, M. E. and Andrade, W. (1992). Decorin, a chondroitin/dermatan sulfate proteoglycan, is under neural control in rat skeletal muscle. *J. Neurosci. Res.* **32**, 51-59.
- Brandan, E. and Inestrosa, N. C. (1987). Isolation of the heparan sulfate proteoglycans from the extracellular matrix of rat skeletal muscle. *J. Neurobiol.* **18**, 271-282.
- Brandan, E., Maldonado, M., Garrido, J. and Inestrosa, N. C. (1985). Anchorage of collagen-tailed acetylcholinesterase to the extracellular matrix is mediated by heparan sulfate proteoglycans. *J. Cell Biol.* **101**, 985-992.
- Buckingham, M. (1992). Making muscle in mammals. *Trends Genet.* **8**, 144-149.
- Caldwell, C. J., Matthey, D. L. and Weller, R. O. (1990). Role of the basement membrane in the regeneration of skeletal muscle. *Neuropathol. Appl. Neurobiol.* **16**, 225-238.
- Campos, A., Nuñez, R., Koenig, C., Carey, D. J. and Brandan, E. (1993). A lipid-anchored heparan sulfate proteoglycan is present in the surface of differentiated skeletal muscle cells. *Eur. J. Cell Biol.* **216**, 587-595.
- Carey, D. J. (1997). Syndecans: multifunctional cell-surface co-receptors. *Biochem. J.* **327**, 1-16.
- Chomczynski, P. and Sacchi, N. (1987). Single-step method of RNA isolation by acid guanidinium thiocyanate-phenol-chloroform extraction. *Anal. Biochem.* **162**, 156-159.
- Clarke, M. S., Khakee, R. and McNeil, P. L. (1993). Loss of cytoplasmic basic fibroblast growth factor from physiologically wounded myofibers of normal and dystrophic muscle. *J. Cell Sci.* **106**, 121-133.
- Cornelison, D. D. and Wold, B. J. (1997). Single-cell analysis of regulatory gene expression in quiescent and activated mouse skeletal muscle satellite cells. *Dev. Biol.* **191**, 270-283.
- Cornelison, D. D. W., Filla, M. S., Stanley, H. M., Rapraeger, A. C. and Olwin, B. B. (2001). Syndecan-3 and syndecan-4 specifically mark skeletal muscle satellite cells and are implicated in satellite cell maintenance and muscle regeneration. *Dev. Biol.* **239**, 79-94.
- Costell, M., Gustafsson, E., Aszodi, A., Morgelin, M., Bloch, W., Hunziker, E., Addicks, K., Timpl, R. and Fassler, R. (1999). Perlecan maintains the integrity of cartilage and some basement membranes. *J. Cell Biol.* **147**, 1109-1122.
- Desgranges, P., Barbaud, C., Caruelle, J. P., Barritault, D. and Gautron, J. (1999). A substituted dextran enhances muscle fiber survival and regeneration in ischemic and denervated rat EDL muscle. *FASEB J.* **13**, 761-766.
- Echtermeyer, F., Streit, M., Wilcox-Adelman, S., Saoncella, S., Denhez, F., Detmar, M. and Goetinck, P. (2001). Delayed wound repair and impaired angiogenesis in mice lacking syndecan-4. *J. Clin. Invest.* **107**, R9-R14.
- Fisher, L. W., Stubbs, J. T., 3rd and Young, M. F. (1995). Antisera and cDNA probes to human and certain animal model bone matrix noncollagenous proteins. *Acta Orthop. Scand.* Supplement **266**, 61-65.
- Floss, T., Arnold, H. H. and Braun, T. (1997). A role for FGF-6 in skeletal muscle regeneration. *Genes Dev.* **11**, 2040-2051.
- Friedl, A., Chang, Z., Tierney, A. and Rapraeger, A. C. (1997). Differential binding of fibroblast growth factor-2 and -7 to basement membrane heparan sulfate: comparison of normal and abnormal human tissues. *Am. J. Pathol.* **150**, 1443-1455.
- Fuentealba, L., Carey, D. J. and Brandan, E. (1999). Antisense inhibition of syndecan-3 expression during skeletal muscle differentiation accelerates myogenesis through a basic fibroblast growth factor-dependent mechanism. *J. Biol. Chem.* **274**, 37876-37884.
- Gautam, M., Noakes, P. G., Moscoso, L., Rupp, F., Scheller, R. H., Merlie, J. P. and Sanes, J. R. (1996). Defective neuromuscular synaptogenesis in agrin-deficient mutant mice. *Cell* **85**, 525-535.
- Goza, L., Sartore, S., Triban, C. and Schiaffino, S. (1983). Embryonic-like myosin heavy chains in regenerating chicken muscle. *Exp. Cell Res.* **143**, 395-403.
- Gulati, A. K., Reddi, A. H. and Zaleski, A. A. (1983). Changes in the basement membrane zone components during skeletal muscle fiber degeneration and regeneration. *J. Cell Biol.* **97**, 957-962.
- Hagiwara, Y., Mizuno, Y., Takemitsu, M., Matsuzaki, T., Nonaka, I. and Ozawa, E. (1995). Dystrophin-positive muscle fibers following C2 myoblast transplantation into mdx nude mice. *Acta Neuropathol.* **90**, 592-600.
- Hawke, T. J. and Garry, D. J. (2001). Myogenic satellite cells: physiology to molecular biology. *J. Appl. Physiol.* **91**, 534-551.
- Iozzo, R. V., Pillarisetti, J., Sharma, B., Murdoch, A. D., Danielson, K. G., Uitto, J. and Mauviel, A. (1997). Structural and functional characterization of the human perlecan gene promoter. Transcriptional activation by transforming growth factor-beta via a nuclear factor 1-binding element. *J. Biol. Chem.* **272**, 5219-5228.
- Jennische, E., Ekberg, S. and Matejka, G. L. (1993). Expression of hepatocyte growth factor in growing and regenerating rat skeletal muscle. *Am. J. Physiol.* **265**, C122-C128.
- Johnson, S. E. and Allen, R. E. (1993). Proliferating cell nuclear antigen (PCNA) is expressed in activated rat skeletal muscle satellite cells. *J. Cell Physiol.* **154**, 39-43.
- Johnson, S. E. and Allen, R. E. (1995). Activation of skeletal muscle satellite cells and the role of fibroblast growth factor receptors. *Exp. Cell Res.* **219**, 449-453.
- Kaariainen, M., Kaariainen, J., Jarvinen, T. L., Nissinen, L., Heino, J., Jarvinen, M. and Kalimo, H. (2000). Integrin and dystrophin associated adhesion protein complexes during regeneration of shearing-type muscle injury. *Neuromuscular Disord.* **10**, 121-132.
- Kaksonen, M., Pavlov, I., Voikar, V., Lauri, S. E., Hienola, A., Riekkki, R., Lakso, M., Taira, T. and Rauvala, H. (2002). Syndecan-3-deficient mice exhibit enhanced LTP and impaired hippocampus-dependent memory. *Mol. Cell Neurosci.* **21**, 158-172.
- Kastner, S., Elias, M. C., Rivera, A. J. and Yablonka-Reuveni, Z. (2000). Gene expression patterns of the fibroblast growth factors and their receptors during myogenesis of rat satellite cells. *J. Histochem. Cytochem.* **48**, 1079-1096.
- Larrain, J., Alvarez, J., Hassell, J. R. and Brandan, E. (1997a). Expression of perlecan, a proteoglycan that binds myogenic inhibitory basic fibroblast growth factor, is down regulated during skeletal muscle differentiation. *Exp. Cell Res.* **234**, 405-412.
- Larrain, J., Carey, D. J. and Brandan, E. (1998). Syndecan-1 expression inhibits myoblast terminal differentiation through a basic fibroblast growth factor-dependent mechanism. *J. Biol. Chem.* **273**, 32288-32296.
- Larrain, J., Cizmeci-Smith, G., Troncoso, V., Stahl, R. C., Carey, D. J. and Brandan, E. (1997b). Syndecan-1 expression is down-regulated during myoblast terminal differentiation. Modulation by growth factors and retinoic acid. *J. Biol. Chem.* **272**, 18418-18424.
- Lawson-Smith, M. J. and McGeachie, J. K. (1998). The identification of myogenic cells in skeletal muscle, with emphasis on the use of tritiated thymidine autoradiography and desmin antibodies. *J. Anat.* **192**, 161-171.
- Lee, J. Y., Qu-Petersen, Z., Cao, B., Kimura, S., Jankowski, R., Cummins,

- J., Usas, A., Gates, C., Robbins, P., Wernig, A. et al. (2000). Clonal isolation of muscle-derived cells capable of enhancing muscle regeneration and bone healing. *J. Cell Biol.* **150**, 1085-1100.
- Lyon, M., Rushton, G. and Gallagher, J. T. (1997). The interaction of the transforming growth factor-betas with heparin/heparan sulfate is isoform-specific. *J. Biol. Chem.* **272**, 18000-18006.
- Megeney, L. A., Kablar, B., Garrett, K., Anderson, J. E. and Rudnicki, M. A. (1996). MyoD is required for myogenic stem cell function in adult skeletal muscle. *Genes Dev.* **10**, 1173-1183.
- Melo, F., Carey, D. J. and Brandan, E. (1996). Extracellular matrix is required for skeletal muscle differentiation but not myogenin expression. *J. Cell Biochem.* **62**, 227-239.
- Morgan, J. E., Moore, S. E., Walsh, F. S. and Partridge, T. A. (1992). Formation of skeletal muscle in vivo from the mouse C2 cell line. *J. Cell Sci.* **102**, 779-787.
- Niu, S., Bahl, J. J., Adamson, C. and Morkin, E. (1998). Structure, regulation and function of avian glypican. *J. Mol. Cell Cardiol.* **30**, 537-550.
- Olguin, H. and Brandan, E. (2001). Expression and localization of proteoglycans during limb myogenic activation. *Dev. Dyn.* **221**, 106-115.
- Osses, N. and Brandan, E. (2001). ECM is required for skeletal muscle differentiation independently of muscle regulatory factor expression. *Am. J. Physiol. Cell Physiol.* **282**, C383-394.
- Peng, H. B., Ali, A. A., Daggett, D. F., Rauvala, H., Hassell, J. R. and Smalheiser, N. R. (1998). The relationship between perlecan and dystroglycan and its implication in the formation of the neuromuscular junction. *Cell Adhes. Commun.* **5**, 475-489.
- Peng, H. B., Xie, H., Rossi, S. G. and Rotundo, R. L. (1999). Acetylcholinesterase clustering at the neuromuscular junction involves perlecan and dystroglycan. *J. Cell Biol.* **145**, 911-921.
- Perrimon, N. and Bernfield, M. (2000). Specificities of heparan sulphate proteoglycans in developmental processes. *Nature* **404**, 725-728.
- Rantanen, J., Hurme, T., Lukka, R., Heino, J. and Kalimo, H. (1995). Satellite cell proliferation and the expression of myogenin and desmin in regenerating skeletal muscle: evidence for two different populations of satellite cells. *Lab. Invest.* **72**, 341-347.
- Rapraeger, A. C. (2001). Molecular interactions of syndecans during development. *Semin. Cell Dev. Biol.* **12**, 107-116.
- Rapraeger, A. C., Krufka, A. and Olwin, B. B. (1991). Requirement of heparan sulfate for bFGF-mediated fibroblast growth and myoblast differentiation. *Science* **252**, 1705-1708.
- Reizes, O., Lincecum, J., Wang, Z., Goldberger, O., Huang, L., Kaksonen, M., Ahima, R., Hinkes, M. T., Barsh, G. S., Rauvala, H. et al. (2001). Transgenic expression of syndecan-1 uncovers a physiological control of feeding behavior by syndecan-3. *Cell* **106**, 105-116.
- Riquelme, C., Larrain, J., Schonherr, E., Henriquez, J. P., Kresse, H. and Brandan, E. (2001). Antisense inhibition of decorin expression in myoblasts decreases cell responsiveness to transforming growth factor beta and accelerates skeletal muscle differentiation. *J. Biol. Chem.* **276**, 3589-3596.
- Sakuma, K., Watanabe, K., Sano, M., Kitajima, S., Sakamoto, K., Uramoto, I. and Totsuka, T. (2000). The adaptive response of transforming growth factor-beta 2 and -beta RII in the overloaded, regenerating and denervated muscles of rats. *Acta Neuropathol.* **99**, 177-185.
- Sanes, J. R., Marshall, L. M. and McMahan, U. J. (1978). Reinnervation of muscle fiber basal lamina after removal of myofibers. Differentiation of regenerating axons at original synaptic sites. *J. Cell Biol.* **78**, 176-198.
- Sartore, S., Gorza, L. and Schiaffino, S. (1982). Fetal myosin heavy chains in regenerating muscle. *Nature* **298**, 294-296.
- Scata, K. A., Bernard, D. W., Fox, J. and Swain, J. L. (1999). FGF receptor availability regulates skeletal myogenesis. *Exp. Cell Res.* **250**, 10-21.
- Schultz, E. (1996). Satellite cell proliferative compartments in growing skeletal muscles. *Dev. Biol.* **175**, 84-94.
- Seale, P. and Rudnicki, M. A. (2000). A new look at the origin, function, and 'stem-cell' status of muscle satellite cells. *Dev. Biol.* **218**, 115-124.
- Silberstein, L., Webster, S. G., Travis, M. and Blau, H. M. (1986). Developmental progression of myosin gene expression in cultured muscle cells. *Cell* **46**, 1075-1081.
- Steinfeld, R., van den Berghe, H. and David, G. (1996). Stimulation of fibroblast growth factor receptor-1 occupancy and signaling by cell surface associated syndecans and glypican. *J. Cell Biol.* **133**, 405-416.
- Stepp, M. A., Gibson, H. E., Gala, P. H., Iglesia, D. D., Pajooesh-Ganji, A., Pal-Ghosh, S., Brown, M., Aquino, C., Schwartz, A. M., Goldberger, O. et al. (2002). Defects in keratinocyte activation during wound healing in the syndecan-1-deficient mouse. *J. Cell Sci.* **115**, 4517-4531.
- Tachibana, I. and Hemler, M. E. (1999). Role of transmembrane 4 superfamily (TM4SF) proteins CD9 and CD81 in muscle cell fusion and myotube maintenance. *J. Cell Biol.* **146**, 893-904.
- Tatsumi, R., Anderson, J. E., Nevoret, C. J., Halevy, O. and Allen, R. E. (1998). HGF/SF is present in normal adult skeletal muscle and is capable of activating satellite cells. *Dev. Biol.* **194**, 114-128.
- Vater, R., Harris, J. B., Anderson, V. B., Roberds, S. L., Campbell, K. P. and Cullen, M. J. (1995). The expression of dystrophin-associated glycoproteins during skeletal muscle degeneration and regeneration. An immunofluorescence study. *J. Neuropathol. Exp. Neurol.* **54**, 557-569.
- Woods, A. (2001). Syndecans: transmembrane modulators of adhesion and matrix assembly. *J. Clin. Invest.* **107**, 935-941.
- Woods, A. and Couchman, J. R. (2000). Integrin modulation by lateral association. *J. Biol. Chem.* **275**, 24233-24236.
- Yaffe, D. and Saxel, O. (1977). Serial passaging and differentiation of myogenic cells isolated from dystrophic mouse muscle. *Nature* **270**, 725-727.
- Yamagata, M., Saga, S., Kato, M., Bernfield, M. and Kimata, K. (1993). Selective distributions of proteoglycans and their ligands in pericellular matrix of cultured fibroblasts. Implications for their roles in cell-substratum adhesion. *J. Cell Sci.* **106**, 55-65.
- Yayon, A., Klagsbrun, M., Esko, J. D., Leder, P. and Ornitz, D. M. (1991). Cell surface, heparin-like molecules are required for binding of basic fibroblast growth factor to its high affinity receptor. *Cell* **64**, 841-848.
